# Supplementary material for: Impact of Air Pollution on Lung Function among Preadolescent Children in Two Cities in Poland
Source: MDPI journal article supplement (doi:10.3390/jcm10112375), 2021-05-28
Supplement: s1 [file s1]

## Supplementary Files

**Table S1.** Regression model for forced vital capacity (FVC, liters).

|                                             | Estimate | Std. Error | t value | Pr(> t ) |
|---------------------------------------------|----------|------------|---------|----------|
| (Intercept)                                 | -2.872   | 0.372      | -7.705  | <0.001   |
| Age (years)                                 | 0.912    | 0.021      | 4.184   | <0.001   |
| Sex (male_)                                 | 0.083    | 0.043      | 1.913   | 0.056    |
| Weight (kg)                                 | 0.011    | 0.002      | 4.732   | <0.001   |
| Height (cm)                                 | 0.024    | 0.003      | 6.844   | <0.001   |
| City (Zabrze vs. Gdynia)                    | -0.186   | 0.046      | -4.010  | <0.001   |
| Distance to major road (category)           | 0.011    | 0.020      | 0.581   | 0.561    |
| Heating furnace in living area (yes vs. no) | 0.013    | 0.073      | 0.179   | 0.858    |
| Smoking parent (yes vs. no)                 | 0.009    | 0.050      | 0.184   | 0.854    |
| Coal- or a wood-burning stove               | -0.274   | 0.290      | -0.945  | 0.344    |

Residual standard error: 0.5628 on 672 degrees of freedom (88 observations deleted due to missingness); Multiple R-squared: 0.4361, Adjusted R-squared: 0.4285; F-statistic: 57.73 on 9 and 672 DF, p-value: < 0.00000000000000022.

**Table S2.** Regression model for forced expiratory volume during the first second of expiration (FEV1, liters)

|                                             | Estimate | Std. Error | t value | Pr(> t ) |
|---------------------------------------------|----------|------------|---------|----------|
| (Intercept)                                 | -2.826   | 0.314      | -8.999  | <0.001   |
| Age (years)                                 | 0.086    | 0.018      | 4.697   | <0.001   |
| Sex (male_)                                 | 0.051    | 0.036      | 1.415   | 0.157    |
| Weight (kg)                                 | 0.007    | 0.001      | 3.544   | <0.001   |
| Height (cm)                                 | 0.024    | 0.002      | 8.077   | <0.001   |
| City (Zabrze vs. Gdynia)                    | -0.084   | 0.039      | -2.148  | 0.032    |
| Distance to major road (category)           | 0.012    | 0.017      | 0.743   | 0.457    |
| Heating furnace in living area (yes vs. no) | 0.005    | 0.061      | 0.089   | 0.929    |
| Smoking parent (yes vs. no)                 | -0.007   | 0.042      | -0.188  | 0.851    |
| Coal- or a wood-burning stove               | -0.063   | 0.244      | -0.261  | 0.794    |

Residual standard error: 0.4742 on 672 degrees of freedom (88 observations deleted due to missingness); Multiple R-squared: 0.4568, Adjusted R-squared: 0.4495; F-statistic: 62.79 on 9 and 672 DF, p-value: < 0.00000000000000022.

**Table S3.** Regression model for FEV1/FVC.

|                                             | Estimate | Std. Error | t value | Pr(> t ) |
|---------------------------------------------|----------|------------|---------|----------|
| (Intercept)                                 | 0.850    | 0.047      | 17.803  | <0.001   |
| Age (years)                                 | 0.000    | 0.002      | 0.016   | 0.987    |
| Sex (male_)                                 | -0.005   | 0.005      | -1.076  | 0.282    |
| Weight (kg)                                 | -0.001   | 0.000      | -4.221  | <0.011   |
| Height (cm)                                 | 0.008    | 0.000      | 1.852   | 0.064    |
| City (Zabrze vs. Gdynia)                    | 0.029    | 0.005      | 4.913   | <0.001   |
| Distance to major road (category)           | -0.000   | 0.002      | -0.205  | 0.837    |
| Heating furnace in living area (yes vs. no) | -0.001   | 0.009      | -0.197  | 0.843    |
| Smoking parent (yes vs. no)                 | -0.005   | 0.006      | -0.859  | 0.390    |
| Coal- or a wood-burning stove               | 0.077    | 0.037      | 2.074   | 0.038    |

Residual standard error: 0.07212 on 672 degrees of freedom (88 observations deleted due to missingness); Multiple R-squared: 0.06711, Adjusted R-squared: 0.05461; F-statistic: 5.371 on 9 and 672 DF, p-value: 0.0000004056.

**Table S4.** Regression model for peak expiratory flow (PEF, liters/min).

|             | Estimate | Std. Error | t value | Pr(> t ) |
|-------------|----------|------------|---------|----------|
| (Intercept) | -259.955 | 45.213     | -5.749  | <0.001   |
| Age (years) | 9.858    | 2.646      | 3.726   | <0.001   |
| Sex (male)  | 3.422    | 5.277      | 0.649   | 0.516    |
| Weight (kg) | 0.666    | 0.294      | 2.267   | 0.023    |
| Height (cm) | 2.448    | 0.428      | 5.714   | <0.001   |

|                                             |         |        |        |       |
|---------------------------------------------|---------|--------|--------|-------|
| City (Zabrze vs. Gdynia)                    | -13.270 | 5.632  | -2.356 | 0.018 |
| Distance to major road (category)           | 3.623   | 2.500  | 1.449  | 0.147 |
| Heating furnace in living area (yes vs. no) | -0.000  | 0.009  | -0.197 | 0.843 |
| Smoking parent (yes vs. no)                 | -0.005  | 0.006  | -0.859 | 0.390 |
| Coal- or a wood-burning stove               | -3.851  | 35.221 | -0.109 | 0.912 |

Residual standard error: 68.27 on 672 degrees of freedom (88 observations deleted due to missingness); Multiple R-squared: 0.3039, Adjusted R-squared: 0.2945, F-statistic: 32.59 on 9 and 672 DF, p-value: <0.00000000000000022.

**Table S5.** Air pollution on spirometry days.

| <b>Pollutant</b>                     | <b>Gdynia</b> | <b>Zabrze</b> | <b>p-value*</b> |
|--------------------------------------|---------------|---------------|-----------------|
| PM <sub>10</sub> , µg/m <sup>3</sup> | 12.99 ± 1.46  | 23.90 ± 4.24  | <0.001          |
| SO <sub>2</sub> , µg/m <sup>3</sup>  | 1.22 ± 0.18   | 6.12 ± 1.51   | <0.001          |
| NO <sub>2</sub> , µg/m <sup>3</sup>  | 11.87 ± 4.78  | 16.31 ± 1.98  | <0.001          |
| O <sub>3</sub> , µg/m <sup>3</sup>   | 54.79 ± 14.35 | 74.41 ± 7.94  | <0.001          |

Values show means±standard deviations; \*,t-test.
